# Supplementary material for: Significant Performance Enhancement in Asymmetric Supercapacitors based on Metal Oxides, Carbon nanotubes and Neutral Aqueous Electrolyte
Source: PubMed Central journal article supplement (PMC4616038; doi:10.1038/srep15551), 2015-10-23
Supplement: srep15551-s1.pdf [file srep15551-s1.pdf]

## Supplementary Information

# **Significant Performance Enhancement in Asymmetric Supercapacitors based on Metal Oxides, Carbon nanotubes and Neutral Aqueous Electrolyte**

*By Arvinder Singh, Amreesh Chandra\**

[\*] Dr. A. Chandra

Department of Physics,

Indian Institute of Technology Kharagpur, Kharagpur-721302, West Bengal, India

E-mail: [achandra@phy.iitkgp.ernet.in](mailto:achandra@phy.iitkgp.ernet.in)

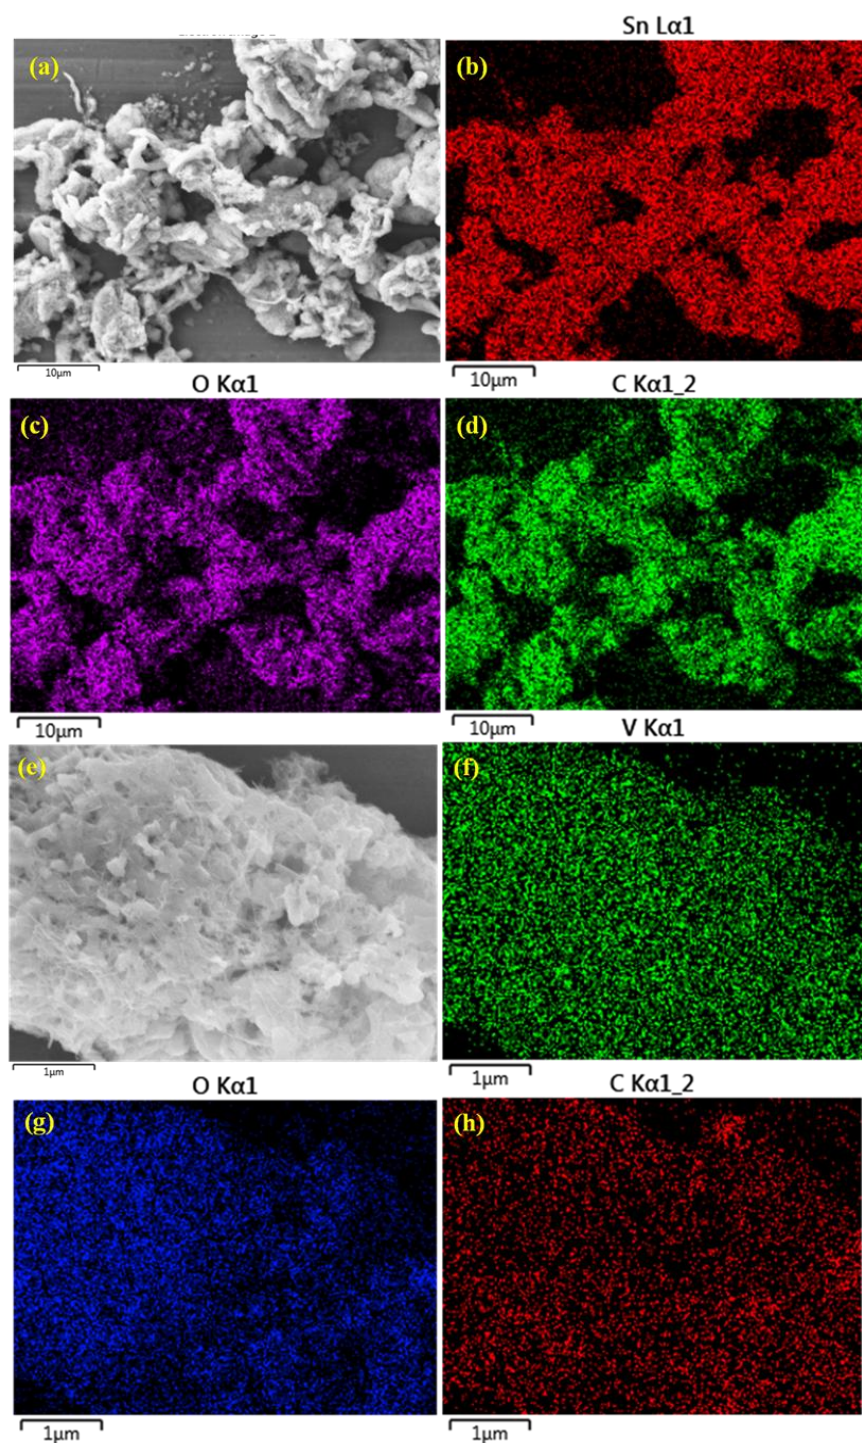

*Fig. S1. Focused ion beam (FIB) elemental maps for the awaited elements in (a-d) MWS; (e-h) MWW composite materials each scanned for 5 minutes*

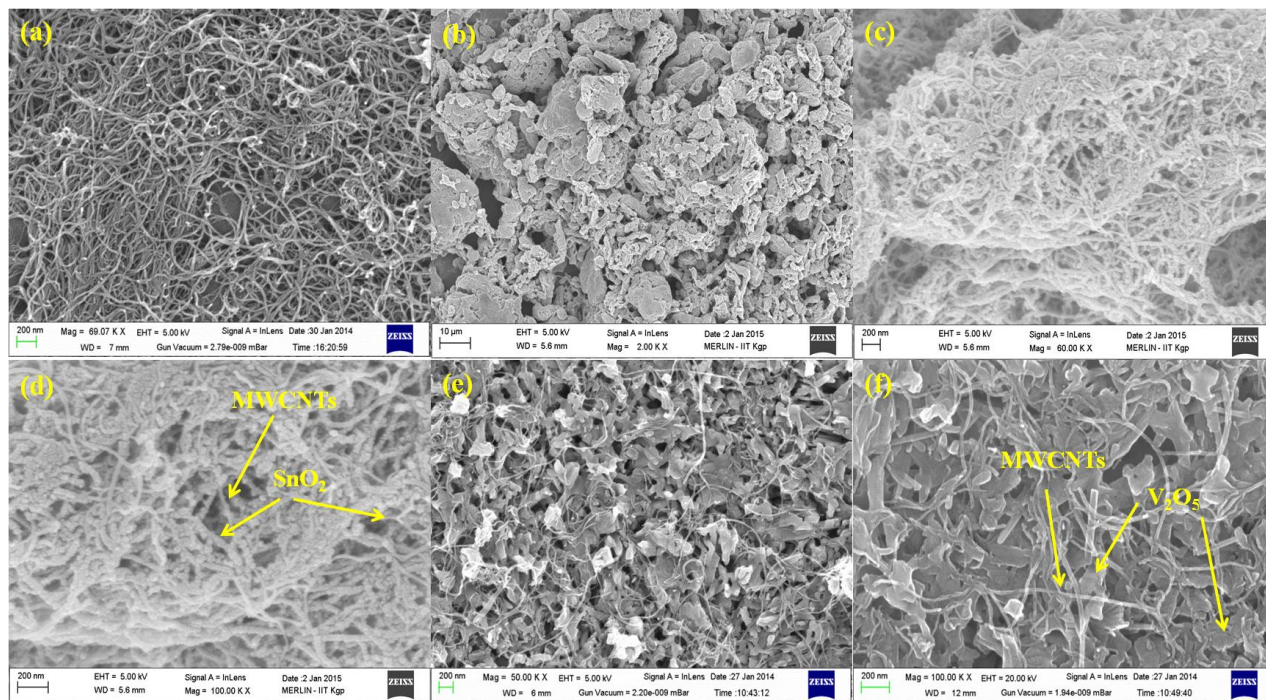

Fig. S2. FESEM micrographs observed for (a) MWCNTs (MW); (b-d) MWS; (e-f) MWV samples

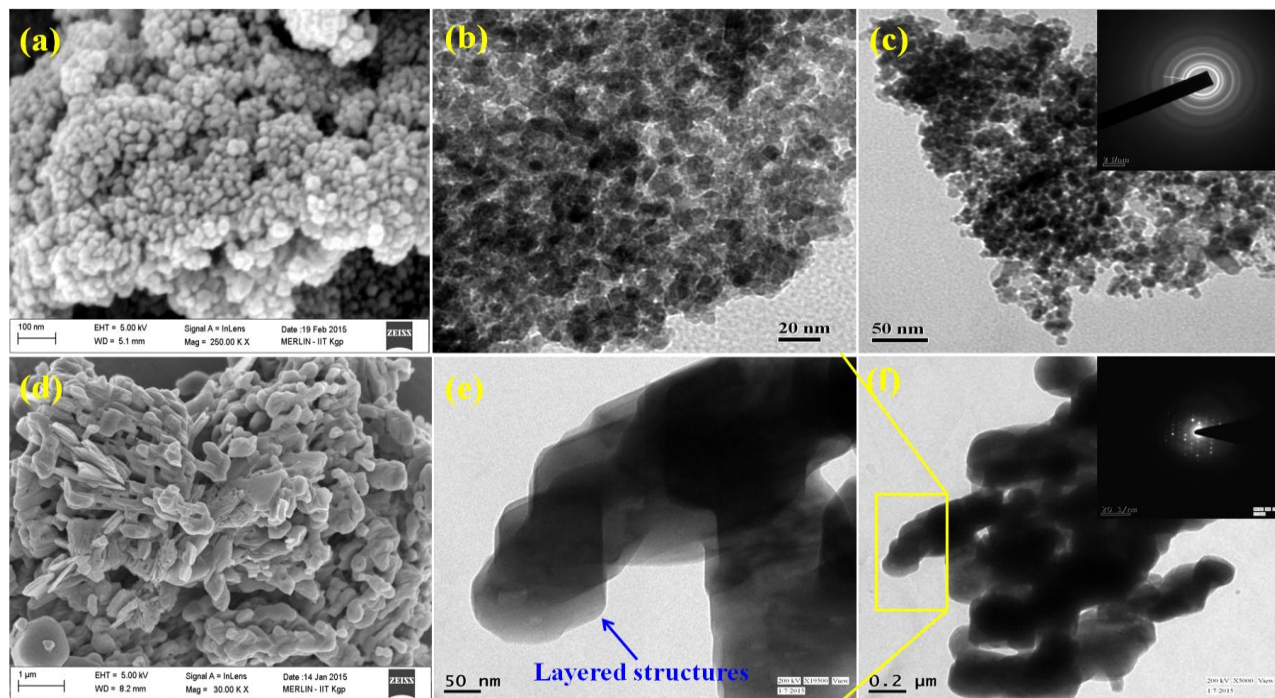

*Fig. S3. FESEM and TEM micrographs for (a-c)  $\text{SnO}_2$ ; (d-f)  $\text{V}_2\text{O}_5$  samples. Inset to (c) and (f) are their respective SAED patterns.*

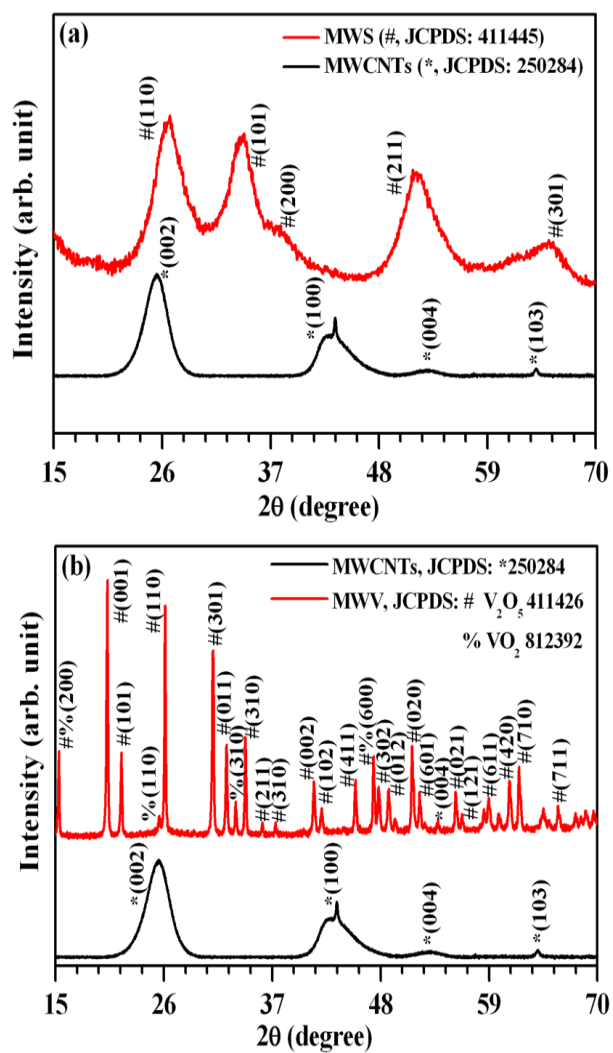

Fig. S4. Typical XRD patterns observed for (a) MW and MWS; (b) MW and MWV composite materials

In order to investigate the crystal structure and phase formation, powder XRD patterns were collected for MWCNTs, MWS and MWV composites (Fig. S4). In Fig. S4a, the XRD pattern of MW showed characteristic graphitic peaks at  $2\theta \sim 25.4^\circ$  and  $\sim 43.5^\circ$  corresponding to (002) and (100) planes, respectively. These two characteristics peaks have nearly vanished in the MWS composite whereas newly originated peaks could be readily indexed to tetragonal phase of SnO<sub>2</sub> according to Joint Committee on Power Diffraction Standards (JCPDS) card no 411445. The disappearance of the characteristics peaks for MW in MWS composite could be assigned to covering of MWCNTs surface with SnO<sub>2</sub> nanoparticles as evident from HRTEM micrographs. Moreover, In the case of MWV composites, all the peaks excluding those for MWCNTs could be indexed to V<sub>2</sub>O<sub>5</sub>/VO<sub>2</sub> phase according to JCPDS files no. 411426/812392 as shown in Figure S4b. The vanishing of the characteristics peaks of MWCNTs is due to dispersion of CNTs underneath the layered structures of V<sub>2</sub>O<sub>5</sub>/VO<sub>2</sub>, which is in well agreement with HRTEM results.

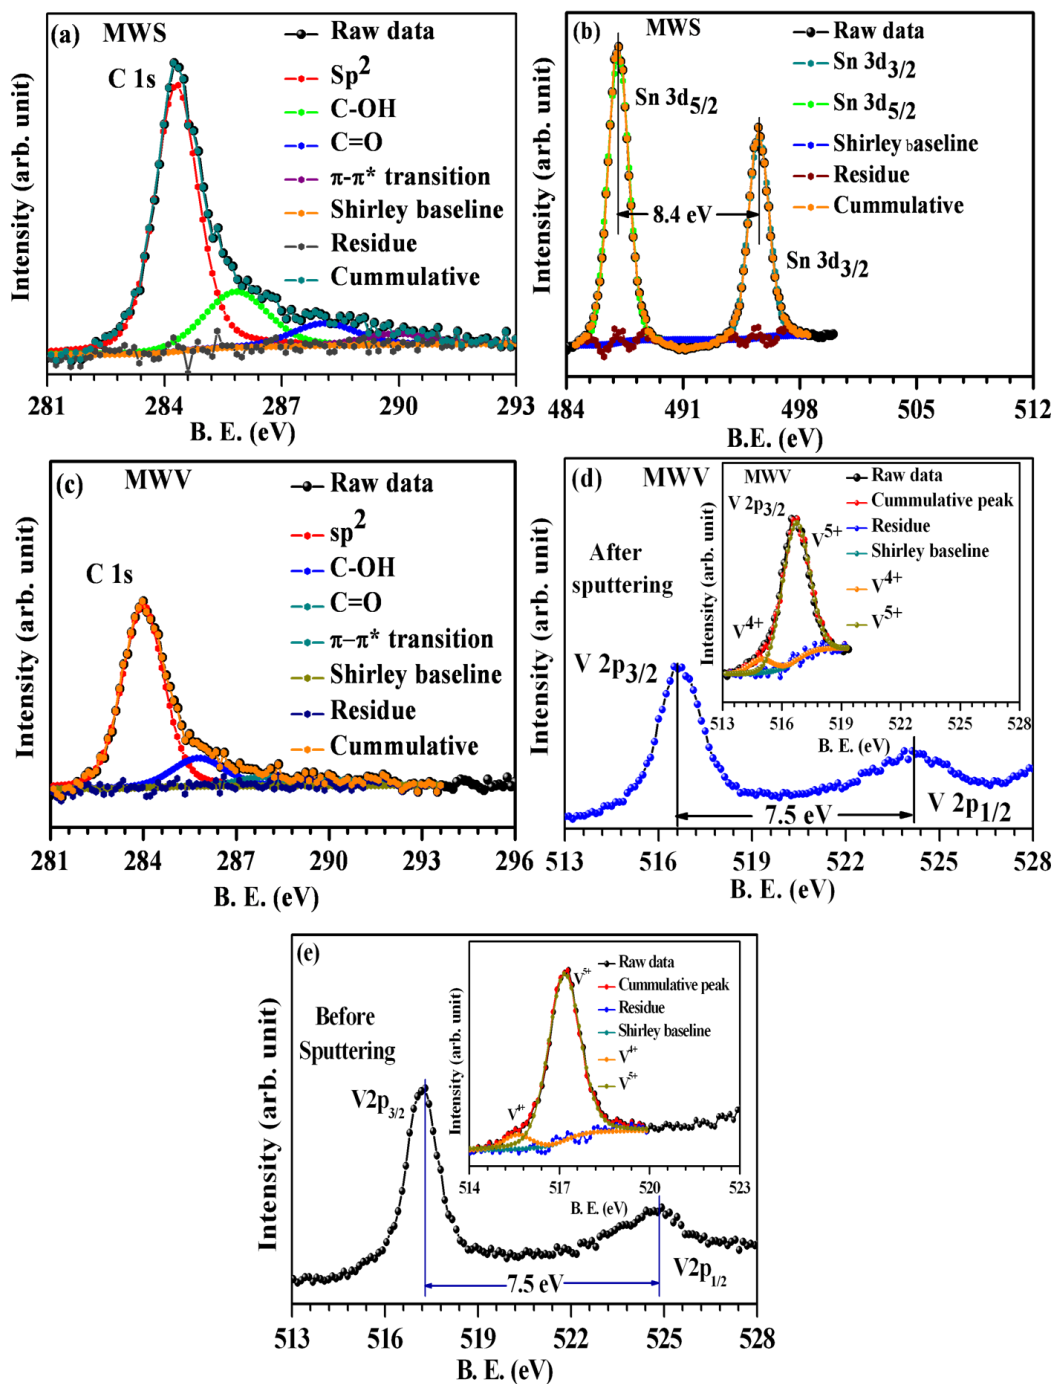

Fig. S5. XPS spectra observed for (a) C 1s for MWS; (b) Sn 3d for MWS; (c) C 1s for MWV; (d) V 2p for MWV composite after sputtering; (e) V 2p for MWV composite before sputtering. An inset to (d) and (e) shows de-convoluted V 2p<sub>3/2</sub> peak.

To determine the chemical composition and valence state of the present elements, the core level X-ray photoelectron spectra (XPS) were recorded for the MWS and MWV composites. The XPS spectrum of standard Ag sample was used to remove surface charging effect. The sample's surface was sputtered up to few nanometers before recording of the XPS spectra. Figure S5a-b shows C 1s and Sn 3d core level spectra for MWS composite, respectively. The C 1s peak is appeared at 284.2 eV with several deconvoluted peaks underneath the C 1s peak, which could be assigned to C=C Sp<sup>2</sup> carbons (284.3 eV), C-OH (285.9 eV), C=O (288.2 eV) and  $\pi$ - $\pi^*$  transition (290.2 eV) in the MW structures, respectively. Moreover, the observed two symmetrical peaks (i.e., Sn 3d<sub>5/2</sub> at ~487.1 eV and Sn 3d<sub>3/2</sub> at ~495.5 eV) with a binding energy separation of 8.4 eV could be assigned to presence of the SnO<sub>2</sub> in the MWS composite (Fig. S5b). The estimated atomic percentage from XPS spectra for the elements present in MWS composite is: C=41.1 %, O=39.3 % and Sn=19.6 % suggesting single phase of SnO<sub>2</sub> (as O and Sn atomic percentage ratio is ~2), which is in well agreement with XRD results. Figure S5c-d shows XPS core level spectra of C 1s and V 2p for the MWV composite, respectively. The C 1s is originated at 284.0 eV; possessing several deconvoluted peaks at 284.0 eV, 285.8 eV, 287.8 eV and 290.4 eV, which could be attributed to sp<sup>2</sup> carbons, C-OH, C=O and  $\pi$ - $\pi^*$  transition (refurbishment of aromaticity after composite synthesis) in MW structure, respectively. Furthermore, in V 2p spectra (before sputtering Fig. S5e and after sputtering Fig. S5d), two characteristic peaks (i.e., V 2p<sub>3/2</sub> and V 2p<sub>1/2</sub>) are appeared at ~516.7 eV (before sputtering ~517.3 eV) and ~524.2 eV (before sputtering ~524.8 eV), respectively with an energy separation of ~7.5 eV. An inset to Fig. S5d-e shows de-convolution of the V 2p<sub>3/2</sub> peak into two components; high energy component peak is assigned to V<sup>5+</sup> and low energy component peak (smaller) is attributed to presence of V<sup>4+</sup> in V<sub>2</sub>O<sub>5</sub> structures. The presence of V<sup>4+</sup> state is found to be increased from ~9.4% (before sputtering) to ~16.8% (after sputtering) due to sputtering of the sample surface. This result shows



the presence of small fraction of VO<sub>2</sub> phase in assistance with V<sub>2</sub>O<sub>5</sub> phase (before sputtering) and is in well agreement with the XRD results. The atomic percentage of the elements presents in MWV composite is: C=42.3 %, O=41.4 % and V=16.2 %.

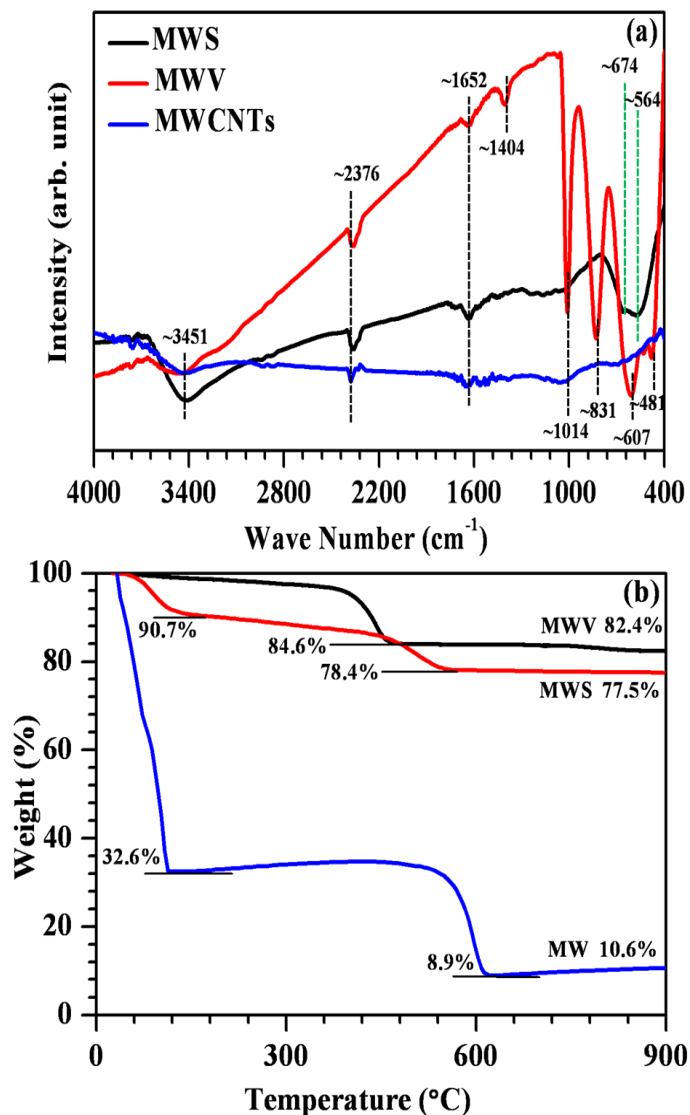

Fig. S6. (a) FTIR spectra; (b) TGA curves for the acid treated MW, MWS and MWV samples

Fourier transfer infrared spectroscopy (FTIR) was performed on MW, MWS and MWV samples which are given in Fig. S6a. Due to the presence of MW, the observed FTIR spectra for all the samples are exhibiting various peaks at ~3451 cm<sup>-1</sup>, ~2376 cm<sup>-1</sup>, ~1652 cm<sup>-1</sup> and ~1404

$\text{cm}^{-1}$ . These peaks are arising due to O-H stretching vibrations from carboxyl groups ( $\text{O}=\text{C}-\text{OH}$  and  $\text{C}-\text{OH}$ ), O-H stretching from strongly hydrogen-bonded  $-\text{COOH}$  groups, skeletal vibrations of unoxidized  $\text{C}=\text{C}$  carbons (MWCNTs backbone) and O-H bending deformation vibration in carboxylic group, respectively. Two newly originated peaks for the MWS composite at  $\sim 674 \text{ cm}^{-1}$  and  $\sim 564 \text{ cm}^{-1}$  are attributed to stretching vibrations of Sn-O bonds, which confirms the presence of  $\text{SnO}_2$  in the MWS matrix. The FTIR spectra of the MWV is possessing several additional absorption peaks appearing at  $\sim 1014 \text{ cm}^{-1}$  and  $\sim 831 \text{ cm}^{-1}$ , which are assigned to (vanadium)-O (vanadyl oxygen) stretching mode and anti-symmetric stretching vibration of the V-O (bridging oxygen)-V group. Two peaks located at  $\sim 607 \text{ cm}^{-1}$  and  $\sim 481 \text{ cm}^{-1}$  are due to edge shearing 3V-O stretching and the bridging V-O (bridging)-V deformations in  $\text{V}_2\text{O}_5$  structures of the MWV composite. These FTIR results reveal the formation of the MWS and MWV composites.

To evaluate the weight percentage of  $\text{SnO}_2$  and  $\text{V}_2\text{O}_5$  in the MWS and MWV composites more precisely, thermogravimetric analysis (TGA) was performed for the functionalized MW and as-prepared MWS and MWV composites (Fig. S6b). The removal of water gives first weight loss below  $100 \text{ }^\circ\text{C}$  in the MWS composite and MW samples. Further weight loss in all the samples ( $500\text{-}600 \text{ }^\circ\text{C}$ ) is due to the decomposition of the functionalized MW. The weight percentages of  $\text{SnO}_2$  and  $\text{V}_2\text{O}_5$  in MWS and MWV composites are found to be 66.9 wt% and 71.8 wt%, respectively; estimated by comparing residual weight percentage of the functionalized MW (10.6 wt%).

**Table S1:** Performance comparison of our ASCs with previously reported aqueous ASCs

| ASCs structure                                                              | Electrolyte used                    | Operating Voltage [V] | Specific energy [Wh kg <sup>-1</sup> ] | Specific power [W kg <sup>-1</sup> ] | Cycles and capacitance fade | Reference no   |
|-----------------------------------------------------------------------------|-------------------------------------|-----------------------|----------------------------------------|--------------------------------------|-----------------------------|----------------|
| MnO <sub>2</sub> //graphene                                                 | Na <sub>2</sub> SO <sub>4</sub>     | 2.0                   | 25.2                                   | 100                                  | 500; 4%                     | 20             |
| Bi <sub>2</sub> O <sub>3</sub> //Activated carbon                           | Li <sub>2</sub> SO <sub>4</sub>     | 1.6                   | 10.2                                   | 822.6                                | -                           | 21             |
| Graphene/MnO <sub>2</sub> //Graphene/MoO <sub>3</sub>                       | Na <sub>2</sub> SO <sub>4</sub>     | 2.0                   | 42.6                                   | 276                                  | 1000; -                     | 36             |
| MnO <sub>2</sub> //Mesoporous CNTs                                          | Na <sub>2</sub> SO <sub>4</sub>     | 2.0                   | 47.4                                   | 200                                  | 1000; 10%                   | 37             |
| Graphene/MnO <sub>2</sub> //FWCNTs//activated carbon//FWCNTs                | Na <sub>2</sub> SO <sub>4</sub>     | 2.0                   | 27                                     | 130                                  | 2000; ~5%                   | 38             |
| CNTs/MnO <sub>2</sub> //CNTs/In <sub>2</sub> O <sub>3</sub>                 | Na <sub>2</sub> SO <sub>4</sub>     | 2.0                   | 25.0                                   | -                                    | -                           | 39             |
| Ni(OH) <sub>2</sub> /CNT/Ni foam//Activated carbon                          | KOH                                 | 1.8                   | 50.6                                   | 95                                   | 3000; 17%                   | 40             |
| Graphene/MnO <sub>2</sub> //Activated carbon nanofiber                      | Na <sub>2</sub> SO <sub>4</sub>     | 1.8                   | 51.1                                   | 198                                  | 1000; 3%                    | 41             |
| Graphene/MnO <sub>2</sub> //Graphene                                        | Na <sub>2</sub> SO <sub>4</sub>     | 2.0                   | 30.4                                   | 100                                  | 1000, 21%                   | 42             |
| MnO <sub>2</sub> //Graphene hydrogel                                        | Na <sub>2</sub> SO <sub>4</sub>     | 2.0                   | 23.2                                   | 1000                                 | 5000; 16.6%                 | 43             |
| Activated graphene/MnO <sub>2</sub> // Activated graphene                   | Na <sub>2</sub> SO <sub>4</sub>     | 2.0                   | 32.3                                   | 21                                   | 5000; 19.5%                 | 44             |
| Graphene/Ni(OH) <sub>2</sub> //Graphene/RuO <sub>2</sub>                    | KOH                                 | 1.5                   | 48.0                                   | 230                                  | 5000; 8%                    | 45             |
| K <sub>0.27</sub> MnO <sub>2</sub> //Activated carbon                       | K <sub>2</sub> SO <sub>4</sub>      | 1.8                   | 25.3                                   | 140                                  | 10000; >2 %                 | 46             |
| Graphene/Polyaniline//Graphene/RuO <sub>2</sub>                             | KOH                                 | 1.4                   | 26.3                                   | 150                                  | 2500; 30%                   | 47             |
| Carbon spheres/MnO <sub>2</sub> //Carbon spheres                            | Na <sub>2</sub> SO <sub>4</sub>     | 2.0                   | 22.1                                   | 100                                  | 1000, 1%                    | 48             |
| MnO <sub>2</sub> //FeOOH                                                    | Li <sub>2</sub> SO <sub>4</sub>     | 1.85                  | 24.0                                   | 450                                  | 2000; 15%                   | 49             |
| MWCNTs/NiS//Graphene                                                        | KOH                                 | 1.4                   | 49.0                                   | 700                                  | 1000, 8%                    | 50             |
| V <sub>2</sub> O <sub>5</sub> nanofiber//Polyaniline nanofiber              | KCl                                 | 2.0                   | 26.7                                   | 220                                  | 2000, 27%                   | 51             |
| 3D Porous graphene/MnO <sub>2</sub> // Graphene/Ag                          | Na <sub>2</sub> SO <sub>4</sub>     | 1.8                   | 50.8                                   | 101.5                                | -                           | 52             |
| Ni-Co oxide//Activated polyaniline derived carbon                           | KOH                                 | 1.6                   | 71.7                                   | 400                                  | 4000; ~12%                  | 53             |
| CoO/Polypyrrole//Activated carbon                                           | NaOH                                | 1.8                   | 43.5                                   | 87.5                                 | 20000; 8.5%                 | 54             |
| Ni(OH) <sub>2</sub> /Graphene//Graphene                                     | KOH                                 | 1.6                   | 77.8                                   | 174.7                                | 3000; 5.7%                  | 55             |
| NiCo <sub>2</sub> O <sub>4</sub> /Graphene//Functionalized Activated carbon | KOH                                 | 1.55                  | 48                                     | 230                                  | 5000; <2%                   | 56             |
| <b>SnO<sub>2</sub>/MWCNT//V<sub>2</sub>O<sub>5</sub>/MWCNT</b>              | <b>Li<sub>2</sub>SO<sub>4</sub></b> | <b>1.8</b>            | <b>89.0</b>                            | <b>903.3</b>                         | <b>1200; 4.2%</b>           | <b>Present</b> |
